# Supplementary material for: Neural activity induced by sensory stimulation can drive large-scale cerebrospinal fluid flow during wakefulness in humans
Source: PubMed Central journal article supplement (PMC10062585; doi:10.1371/journal.pbio.3002035), 2023-03-30

**A** Flow related enhancement signals in CSF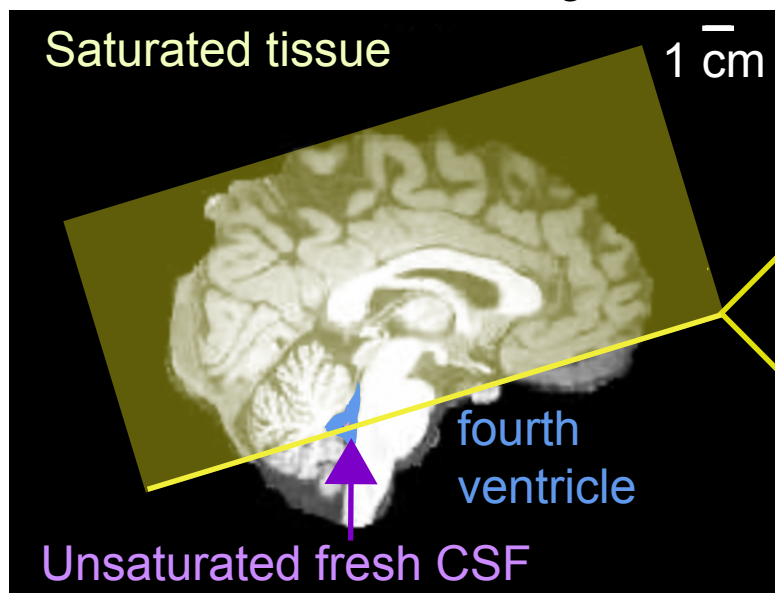**B**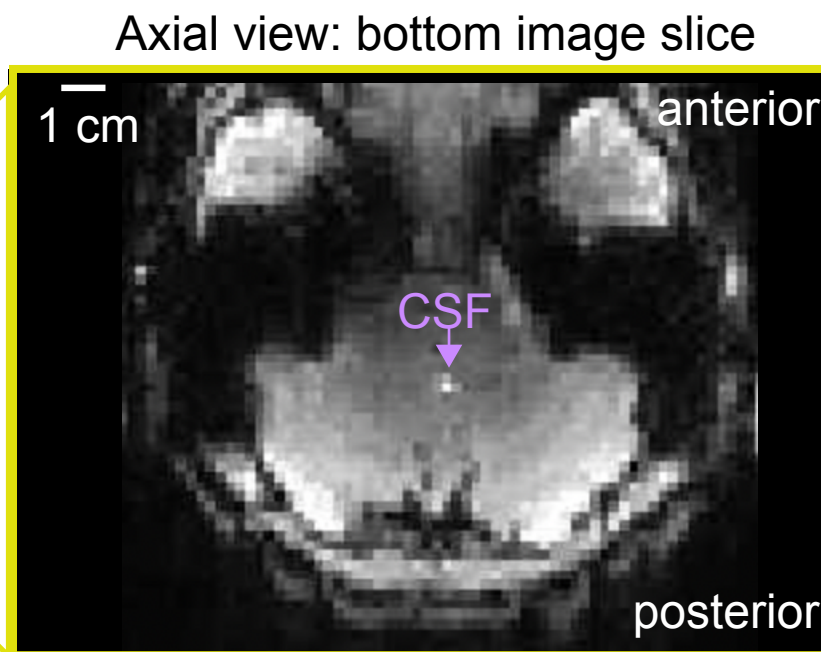**C** Schematic of CSF velocity in ventricle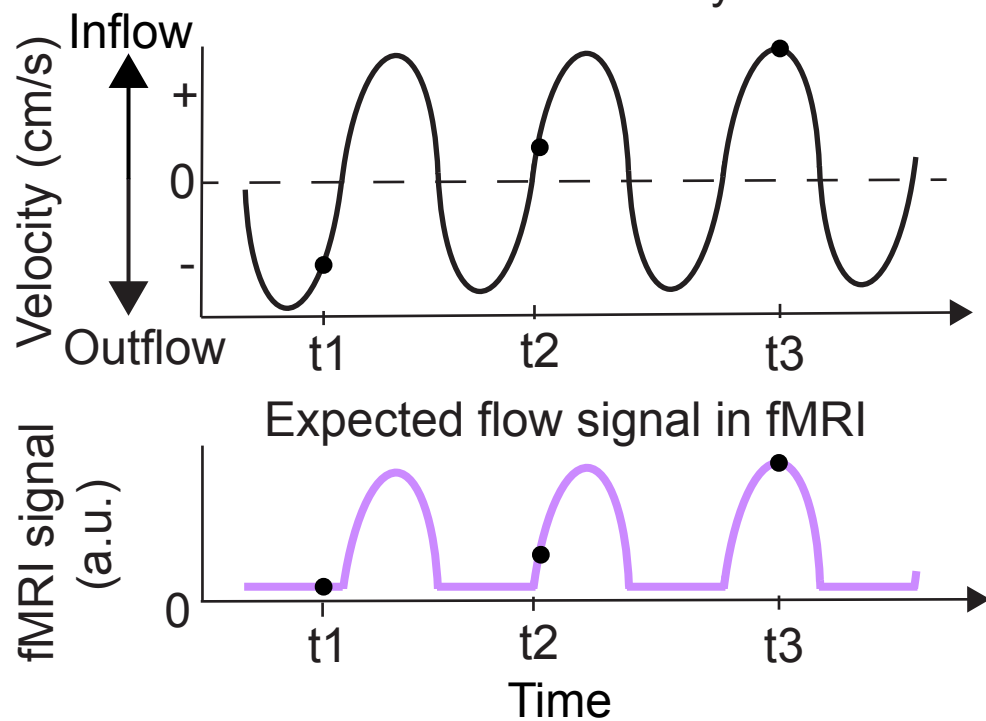**D**

Schematic of flow signal across 3 slices

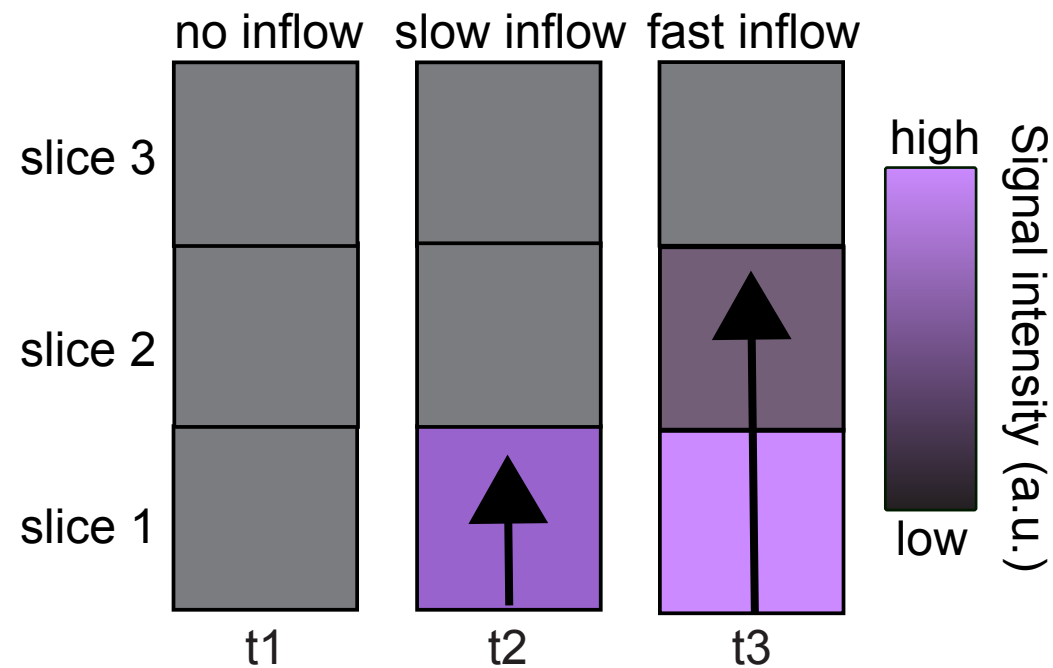

Supplement: pbio.3002035.s001.pdf [file pbio.3002035.s001.pdf]
