# Supplementary material for: Neural activity induced by sensory stimulation can drive large-scale cerebrospinal fluid flow during wakefulness in humans
Source: PubMed Central journal article supplement (PMC10062585; doi:10.1371/journal.pbio.3002035), 2023-03-30

**A** Example framewise displacement (FD) and CSF timeseries

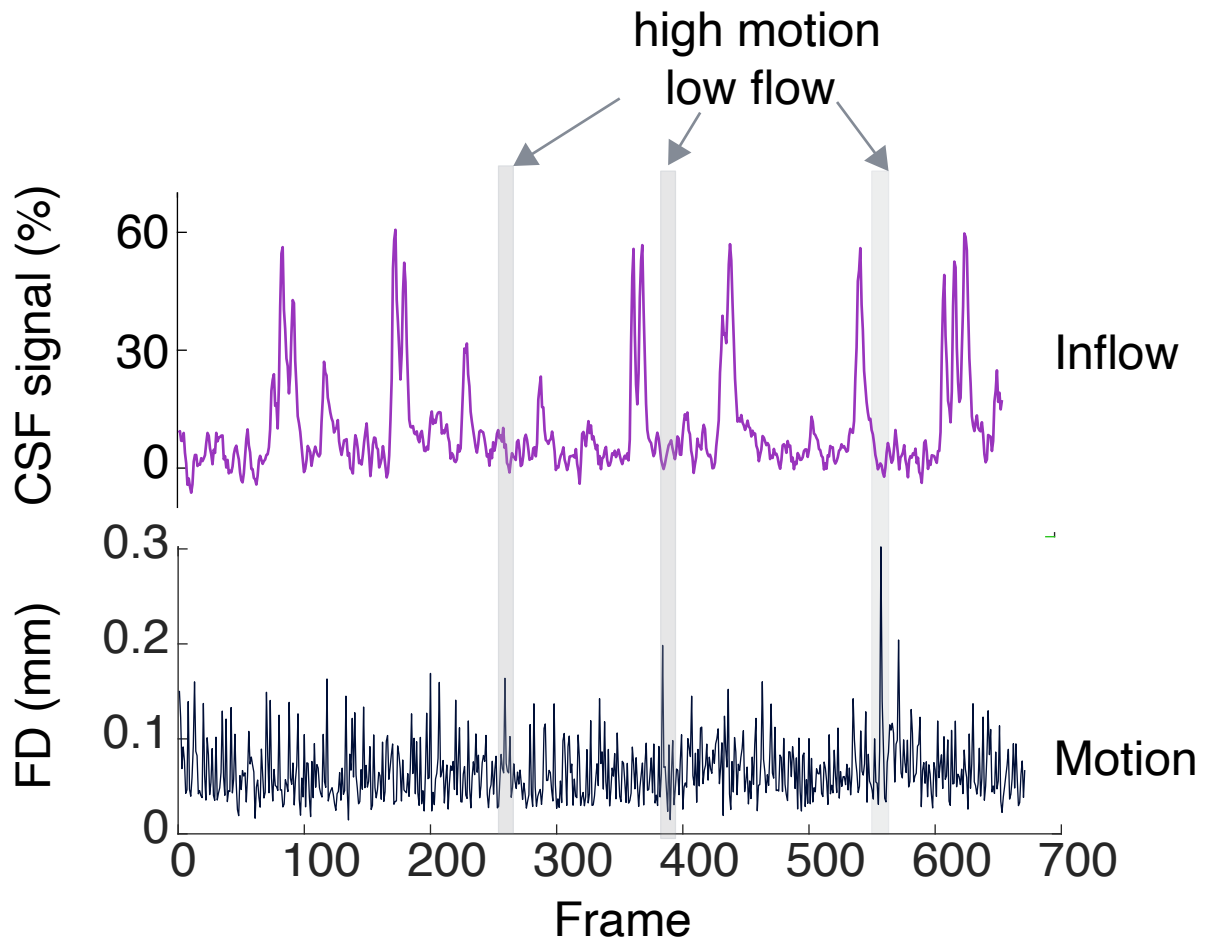

**B** Correlation between motion and CSF flow

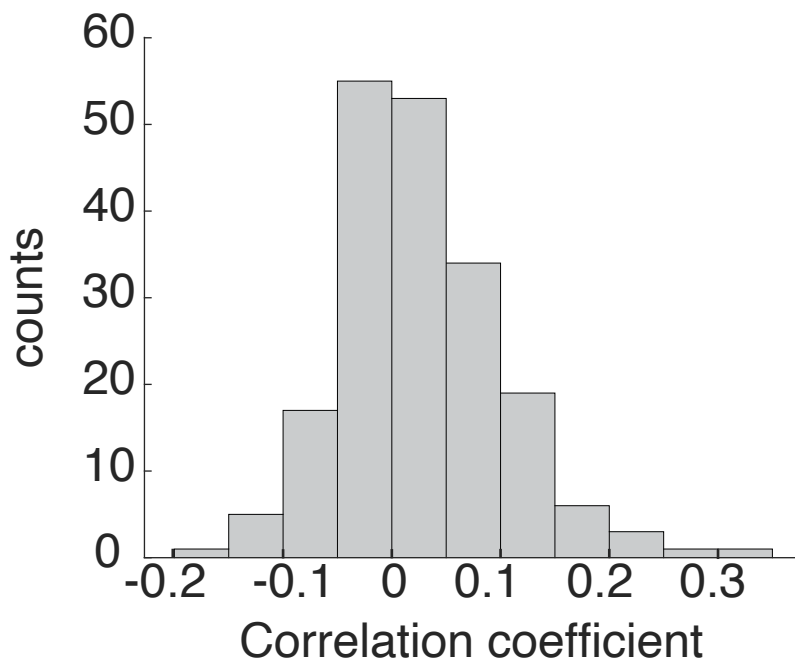

Supplement: pbio.3002035.s002.pdf [file pbio.3002035.s002.pdf]
