# Supplementary material for: Neural activity induced by sensory stimulation can drive large-scale cerebrospinal fluid flow during wakefulness in humans
Source: PubMed Central journal article supplement (PMC10062585; doi:10.1371/journal.pbio.3002035), 2023-03-30

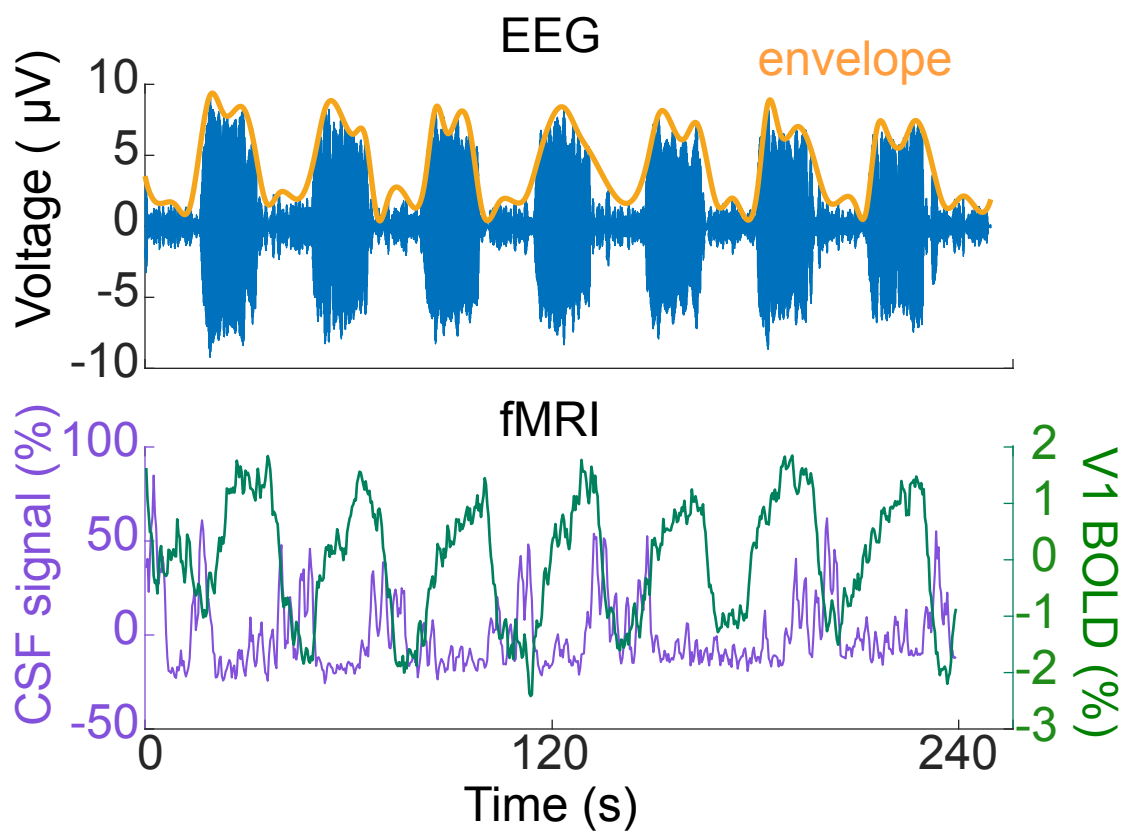

Supplement: pbio.3002035.s005.pdf [file pbio.3002035.s005.pdf]
